# Supplementary material for: Interface energies of Ga2O3 phases with the sapphire substrate and the phase-locked epitaxy of metastable structures explained
Source: Royal Society of Chemistry journal article supplement (doi:10.1039/d4tc04307c), 2024-11-15
Supplement: d4tc04307c1.pdf [file d4tc04307c1.pdf]

## SUPPLEMENTARY INFORMATION FOR

### Interface energies of Ga<sub>2</sub>O<sub>3</sub> phases with the sapphire substrate and the phase-locked epitaxy of metastable structures explained

Ilaria Bertoni\*<sup>a</sup>, Aldo Ugolotti<sup>a</sup>, Emilio Scalise<sup>a</sup>, Roberto Bergamaschini<sup>a</sup>, and Leo Miglio<sup>a</sup>

<sup>a</sup> *Department of Materials Science, University of Milano-Bicocca, via Cozzi 55, 20125 Milan (Italy)*

| phase                                     | a[Å]   | b[Å]  | c[Å]   |
|-------------------------------------------|--------|-------|--------|
| $\kappa$ - Ga <sub>2</sub> O <sub>3</sub> | 5.061  | 8.686 | 9.292  |
| $\beta$ - Ga <sub>2</sub> O <sub>3</sub>  | 14.763 | 3.048 | 5.809  |
| $\alpha$ - Ga <sub>2</sub> O <sub>3</sub> | 5.001  | 5.001 | 13.448 |
| $\alpha$ - Al <sub>2</sub> O <sub>3</sub> | 4.775  | 4.775 | 13.015 |

Table S1: Lattice parameters of optimized bulk cells, oriented according to the substrate. The slabs of the film were built in order to align the  $\beta$  [102] along the  $\alpha$  [100], the  $\beta$  [010] along the  $\alpha$  [120], the  $\kappa$  [100] along the  $\alpha$  [100] and the  $\kappa$  [010] along the  $\alpha$  [120].

| phase                                                                                                       | x/y axis                 | m <sub>x</sub> / m <sub>y</sub> misfit strain |                                              |                                             |
|-------------------------------------------------------------------------------------------------------------|--------------------------|-----------------------------------------------|----------------------------------------------|---------------------------------------------|
|                                                                                                             |                          | vs $\alpha$ - Al <sub>2</sub> O <sub>3</sub>  | vs $\alpha$ - Ga <sub>2</sub> O <sub>3</sub> | vs $\beta$ - Ga <sub>2</sub> O <sub>3</sub> |
| $\kappa$ - Ga <sub>2</sub> O <sub>3</sub>                                                                   | [100]/[010]              | 4.8 % / 5.7 %                                 | 0.3 % / -1.2 %                               | 2.8 % / -5.3 %                              |
| $\beta$ - Ga <sub>2</sub> O <sub>3</sub>                                                                    | [102]/[010]              | 9.5 % / 3.0 %                                 | 5.3 % / -1.6 %                               | -                                           |
| $\alpha$ - Ga <sub>2</sub> O <sub>3</sub>                                                                   | [100]/[120]              | 4.5 % / 4.5 %                                 | -                                            | -                                           |
| $\alpha$ - Al <sub>2</sub> O <sub>3</sub>                                                                   | [100]/[120]              | -                                             | -                                            | -                                           |
| epitaxial relationship: n <sub>x</sub> × n <sub>y</sub> (film): n <sub>x</sub> × n <sub>y</sub> (substrate) |                          |                                               |                                              |                                             |
| phase                                                                                                       | in-plane cell            | vs $\alpha$ - Al <sub>2</sub> O <sub>3</sub>  | vs $\alpha$ - Ga <sub>2</sub> O <sub>3</sub> | vs $\beta$ - Ga <sub>2</sub> O <sub>3</sub> |
| $\kappa$ - Ga <sub>2</sub> O <sub>3</sub>                                                                   | conventional-rectangular | 1 × 1:1 × 1                                   | 1 × 1:1 × 1                                  | 1 × 1:1 × 1                                 |
| $\beta$ - Ga <sub>2</sub> O <sub>3</sub>                                                                    | conventional-rectangular | 1 × 3:3 × 1                                   | 1 × 3:3 × 1                                  | 1 × 3:3 × 1                                 |
| $\alpha$ - Ga <sub>2</sub> O <sub>3</sub>                                                                   | primitive-hexagonal      | 1 × 1:1 × 1                                   | 1 × 1:1 × 1                                  | 1 × 1:1 × 1                                 |

Table S2: Misfit strain with the substrate, calculated as:  $m_i = (a_i^{film} - a_i^{substr}) / a_i^{film}$ .  $a_i$  is the lattice parameter of the film/substrate along the given direction.

| phase                                                                              | $\Delta\mu_\varepsilon$ [meV/f.u.] | $\gamma_{\text{epi}}$ [meV/f.u.] | $v$ [ $\text{\AA}^3$ /f.u.] | $h$ [ $\text{\AA}$ ] |
|------------------------------------------------------------------------------------|------------------------------------|----------------------------------|-----------------------------|----------------------|
| on $\alpha - \text{Al}_2\text{O}_3$ substrate                                      |                                    |                                  |                             |                      |
| $\alpha$                                                                           | 309                                | 88                               | 45.8                        | 2.32                 |
| $\beta$                                                                            | 540                                | 57                               | 48.6                        | 4.93                 |
| $\kappa$                                                                           | 314                                | 86                               | 48.1                        | 4.88                 |
| on $\alpha - \text{Ga}_2\text{O}_3^\varepsilon$ substrate                          |                                    |                                  |                             |                      |
| $\alpha$                                                                           | 309                                | 88                               | 45.8                        | 2.32                 |
| $\beta$                                                                            | 540                                | 57                               | 48.6                        | 4.93                 |
| $\kappa$                                                                           | 314                                | 86                               | 48.1                        | 4.88                 |
| on $\alpha - \text{Ga}_2\text{O}_3$ substrate                                      |                                    |                                  |                             |                      |
| $\alpha$                                                                           | 0                                  | 70                               | 48.5                        | 2.24                 |
| $\beta$                                                                            | 150                                | 53                               | 51.3                        | 4.74                 |
| $\kappa$                                                                           | 10                                 | 53                               | 50.8                        | 4.69                 |
| $\alpha - \text{Al}_2\text{O}_3: \gamma_{\text{epi}} = 113\text{meV}/\text{\AA}^2$ |                                    |                                  |                             |                      |

Table S3: Elastic energy, surface energy of the epilayer, atomic volume of the cell and thickness of the layer for the different phases, given  $\alpha - \text{Al}_2\text{O}_3$  substrate,  $\alpha - \text{Ga}_2\text{O}_3$  strained interlayer and  $\text{Ga}_2\text{O}_3$  fully relaxed interlayer.

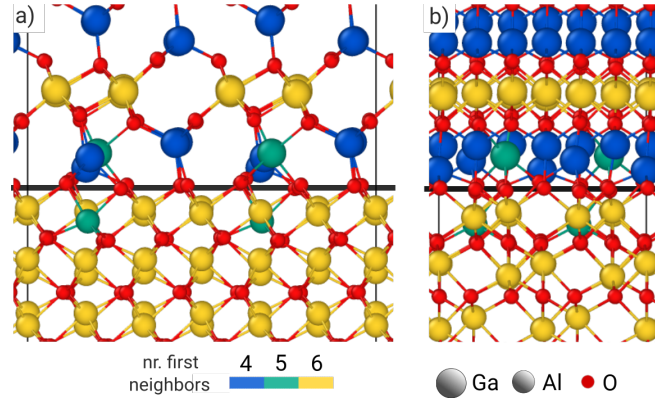

Figure S1: Front (a) and side (b) view of the  $\beta - \text{Ga}_2\text{O}_3/\alpha - \text{Al}_2\text{O}_3$  interface nr. 2. The black line marks the plane of O atoms shared by both film and substrate.

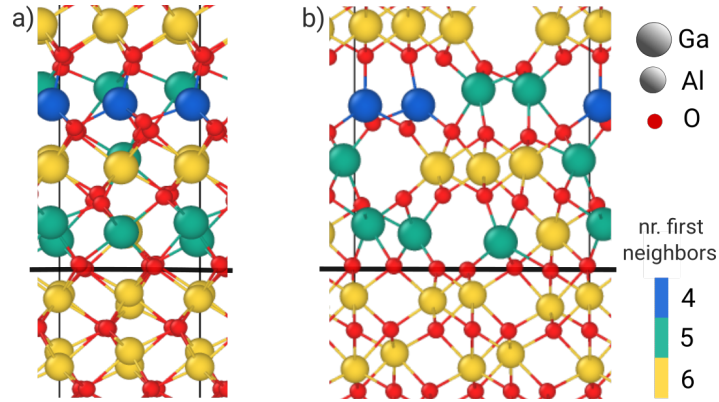

Figure S2: Front (a) and side (b) view of the  $\kappa - \text{Ga}_2\text{O}_3/\alpha - \text{Al}_2\text{O}_3$  interface nr. 2. The black line marks the plane of O atoms shared by both film and substrate.

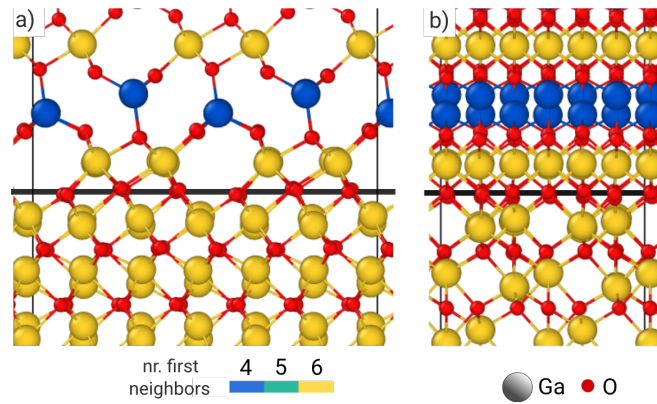

Figure S3: Front (a) and side (b) view of the  $\beta - \text{Ga}_2\text{O}_3/\alpha - \text{Ga}_2\text{O}_3$  interface. The  $\beta - \text{Ga}_2\text{O}_3$  interlayer is fully strained on  $\alpha - \text{Al}_2\text{O}_3$  substrate. The black line marks the plane of O atoms shared by both film and substrate.

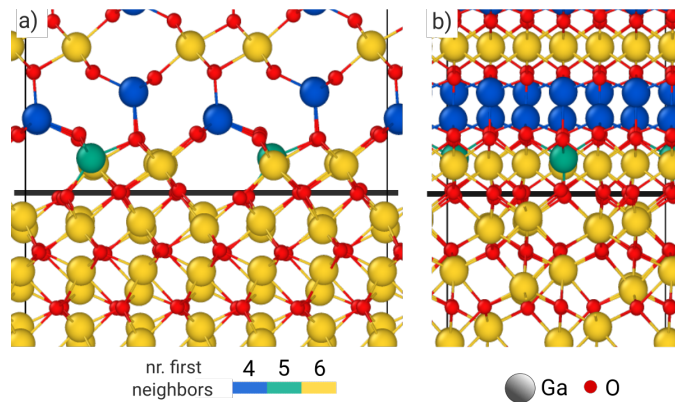

Figure S4: Front (a) and side (b) view of the  $\beta - \text{Ga}_2\text{O}_3/\alpha - \text{Ga}_2\text{O}_3$  interface. The  $\beta - \text{Ga}_2\text{O}_3$  interlayer is fully relaxed. The black line marks the plane of O atoms shared by both film and substrate.

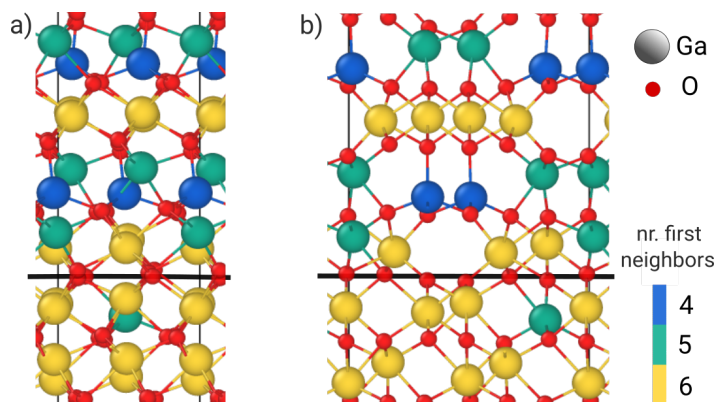

Figure S5: Front (a) and side (b) view of the  $\kappa - \text{Ga}_2\text{O}_3/\alpha - \text{Al}_2\text{O}_3$  interface. The  $\alpha - \text{Ga}_2\text{O}_3$  interlayer is fully strained on  $\alpha - \text{Al}_2\text{O}_3$  substrate. The black line marks the plane of O atoms shared by both film and substrate.

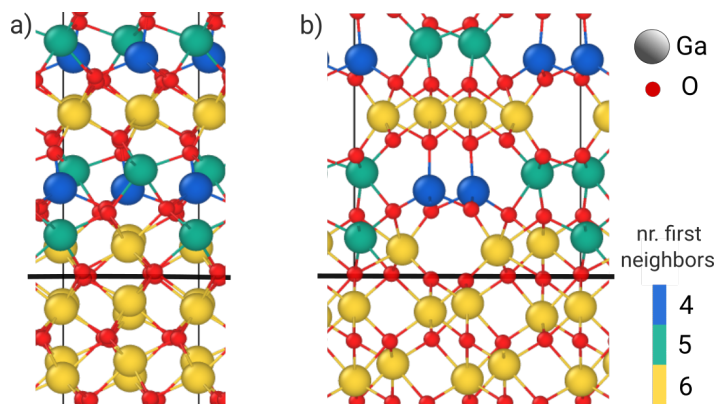

Figure S6: Front (a) and side (b) view of the  $\kappa - \text{Ga}_2\text{O}_3/\alpha - \text{Al}_2\text{O}_3$  interface. The  $\alpha - \text{Ga}_2\text{O}_3$  interlayer is fully relaxed. The black line marks the plane of O atoms shared by both film and substrate.

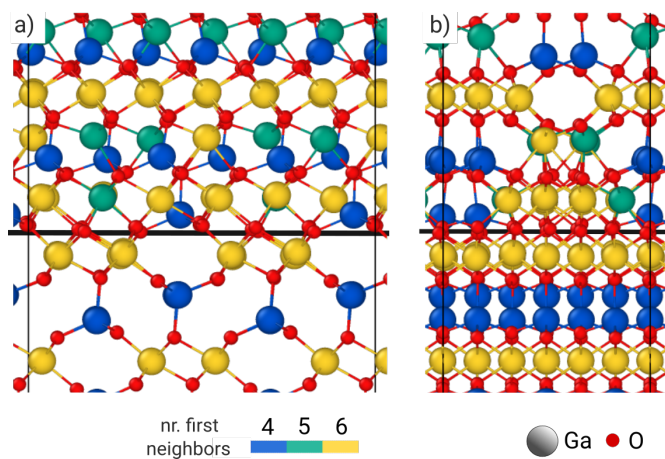

Figure S7: Front (a) and side (b) view of the  $\kappa - \text{Ga}_2\text{O}_3/\beta - \text{Ga}_2\text{O}_3$  interface. The  $\beta - \text{Ga}_2\text{O}_3$  interlayer is fully relaxed. The black line marks the plane of O atoms shared by both film and substrate.

The files of the optimized structures reported in the main manuscript and in the Supplementary Information are collected in the archive `supplementary_information_geometries.zip`
